# Supplementary material
Source: PubMed Central journal article supplement (PMC4560660)

### Manhattan Plot of Discovery set

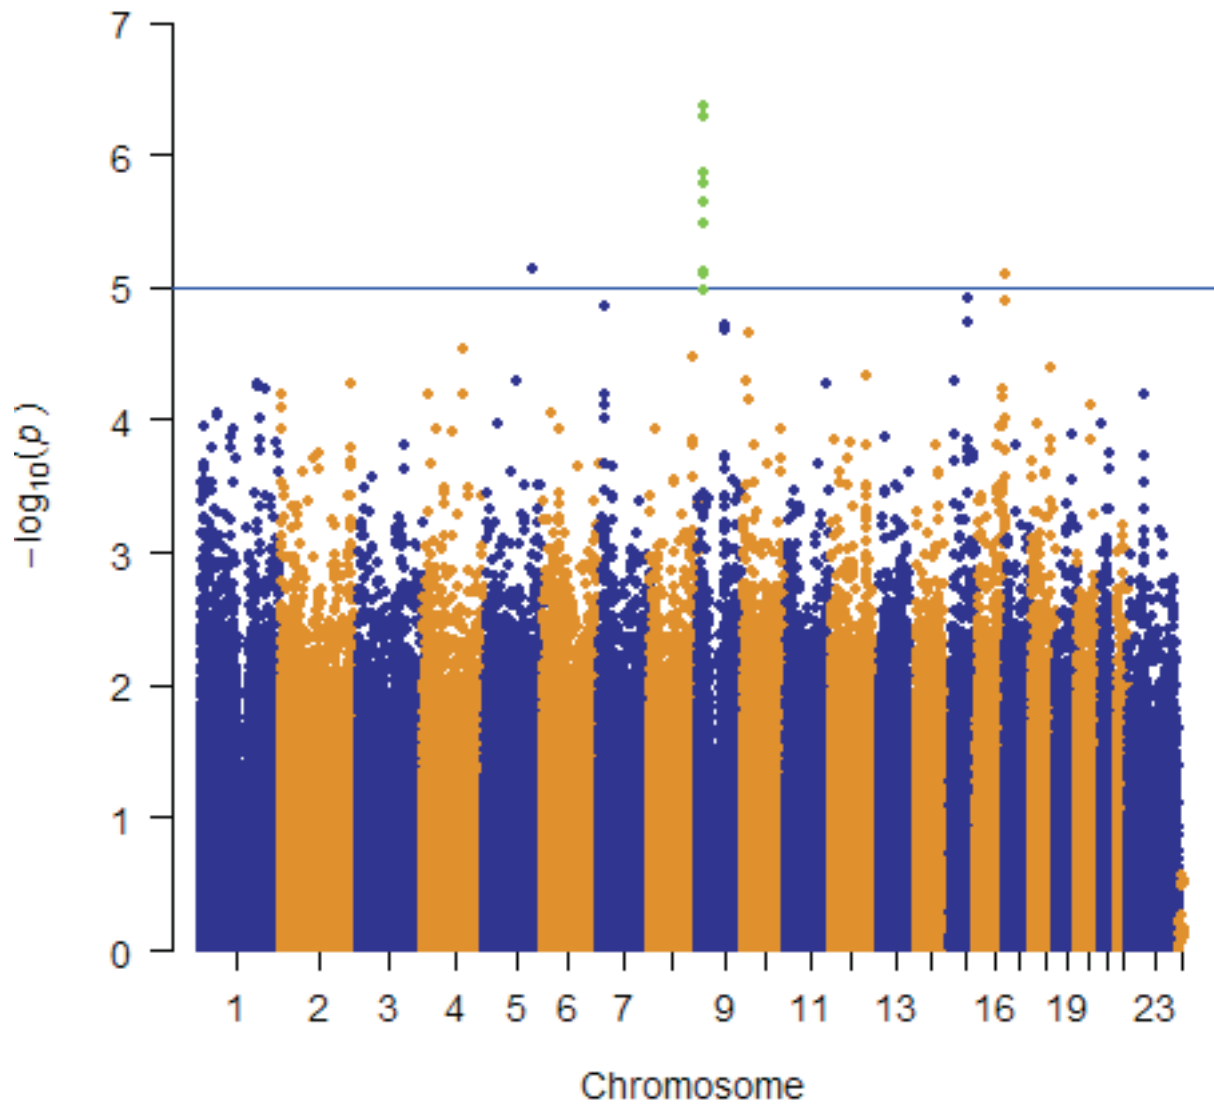

Supplemental Figure 2

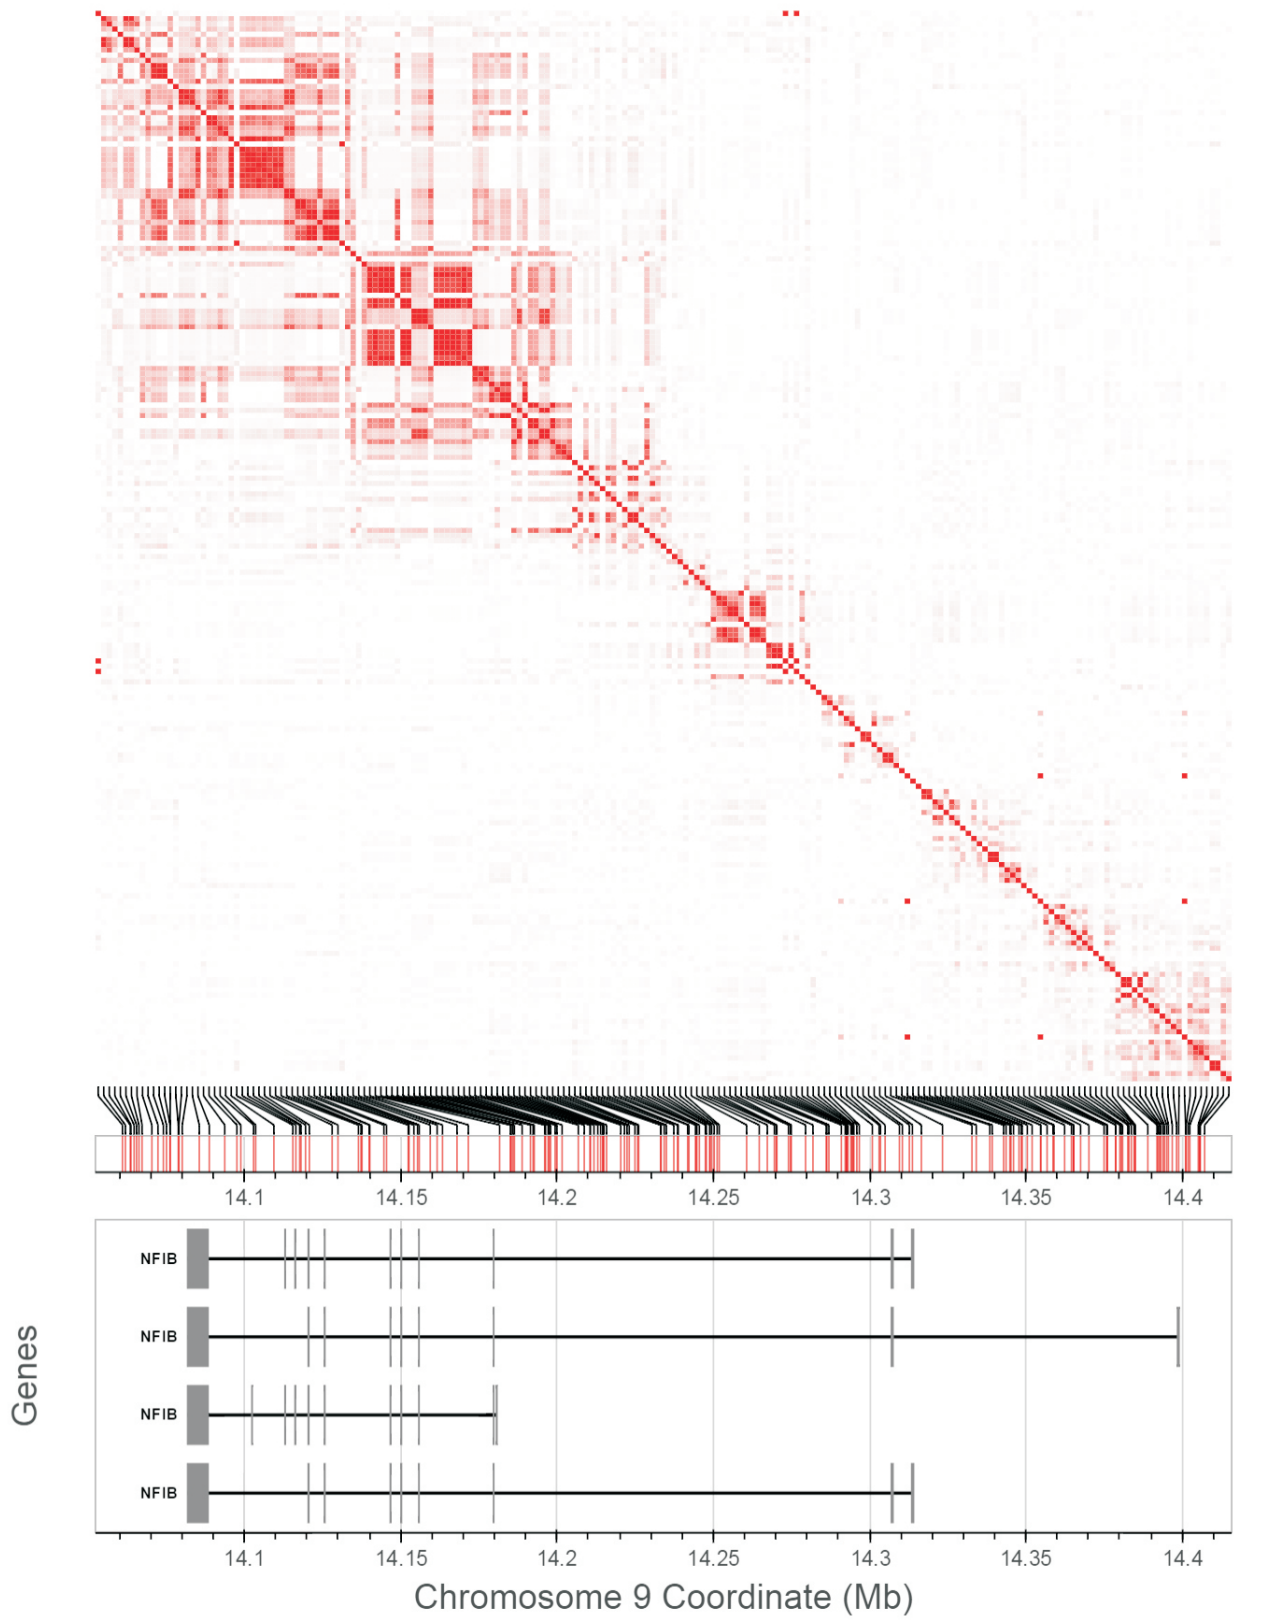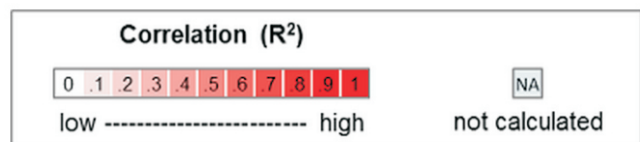

OS cell lines (n=17)  
p-value: 0.0059

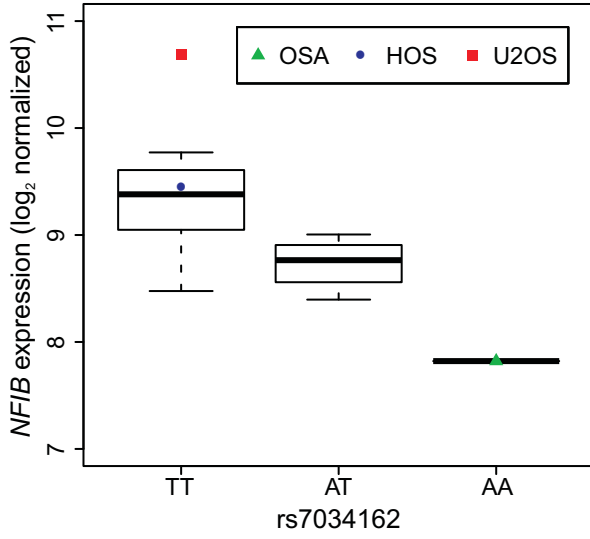

OS cell lines (n=17)  
p-value: 0.0592

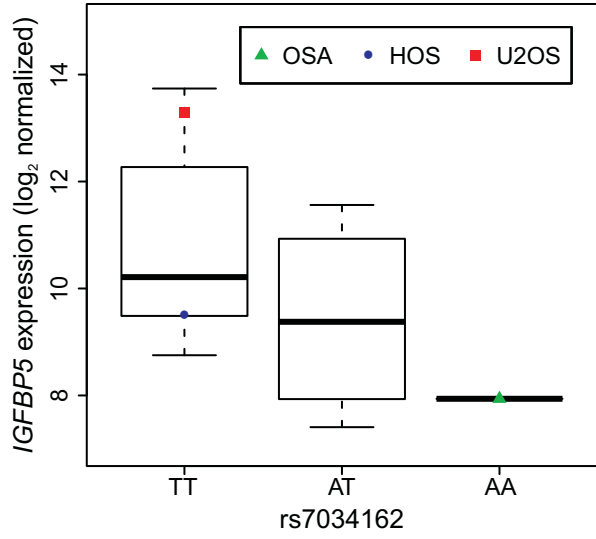

OS tumors (n=29)  
p-value: 0.0211

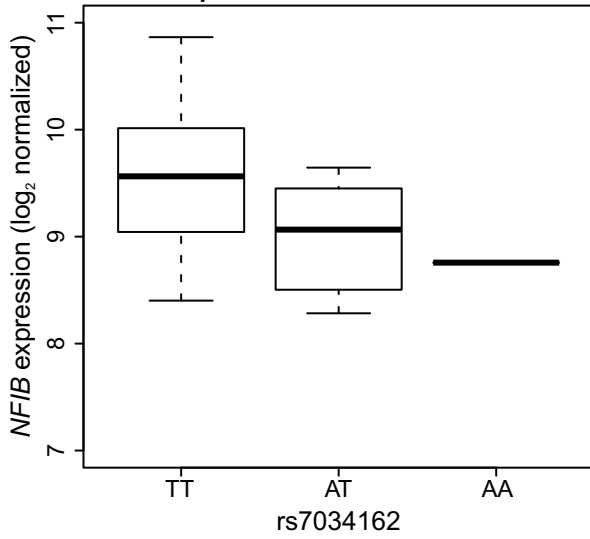

OS tumors (n=29)  
p-value: 0.0121

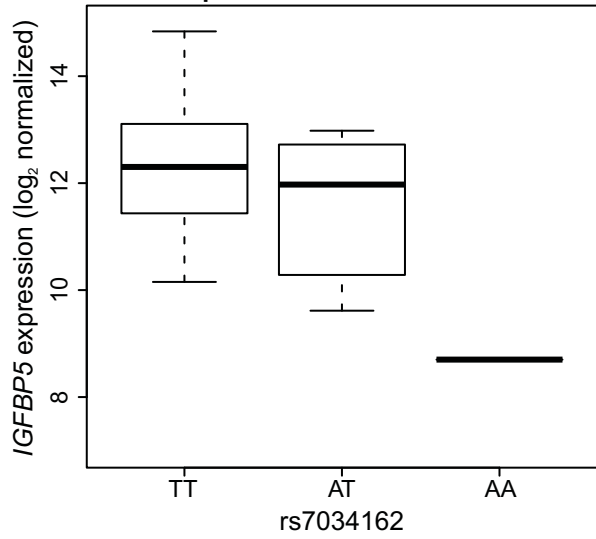

OS cell lines & tumors  
p-value: 2e-04

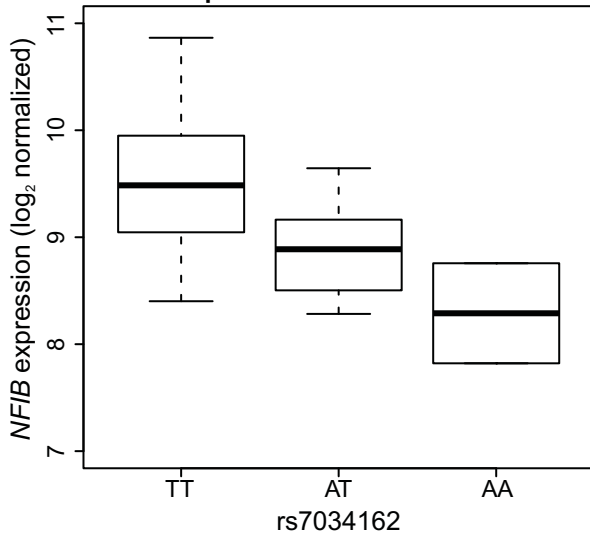

OS cell lines & tumors  
p-value: 0.0024

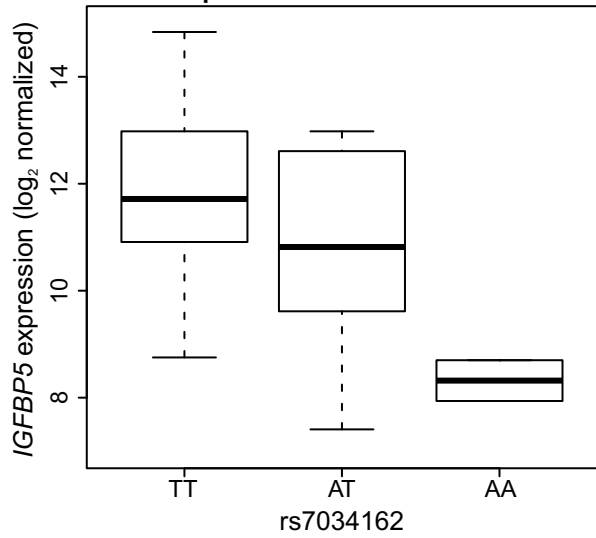

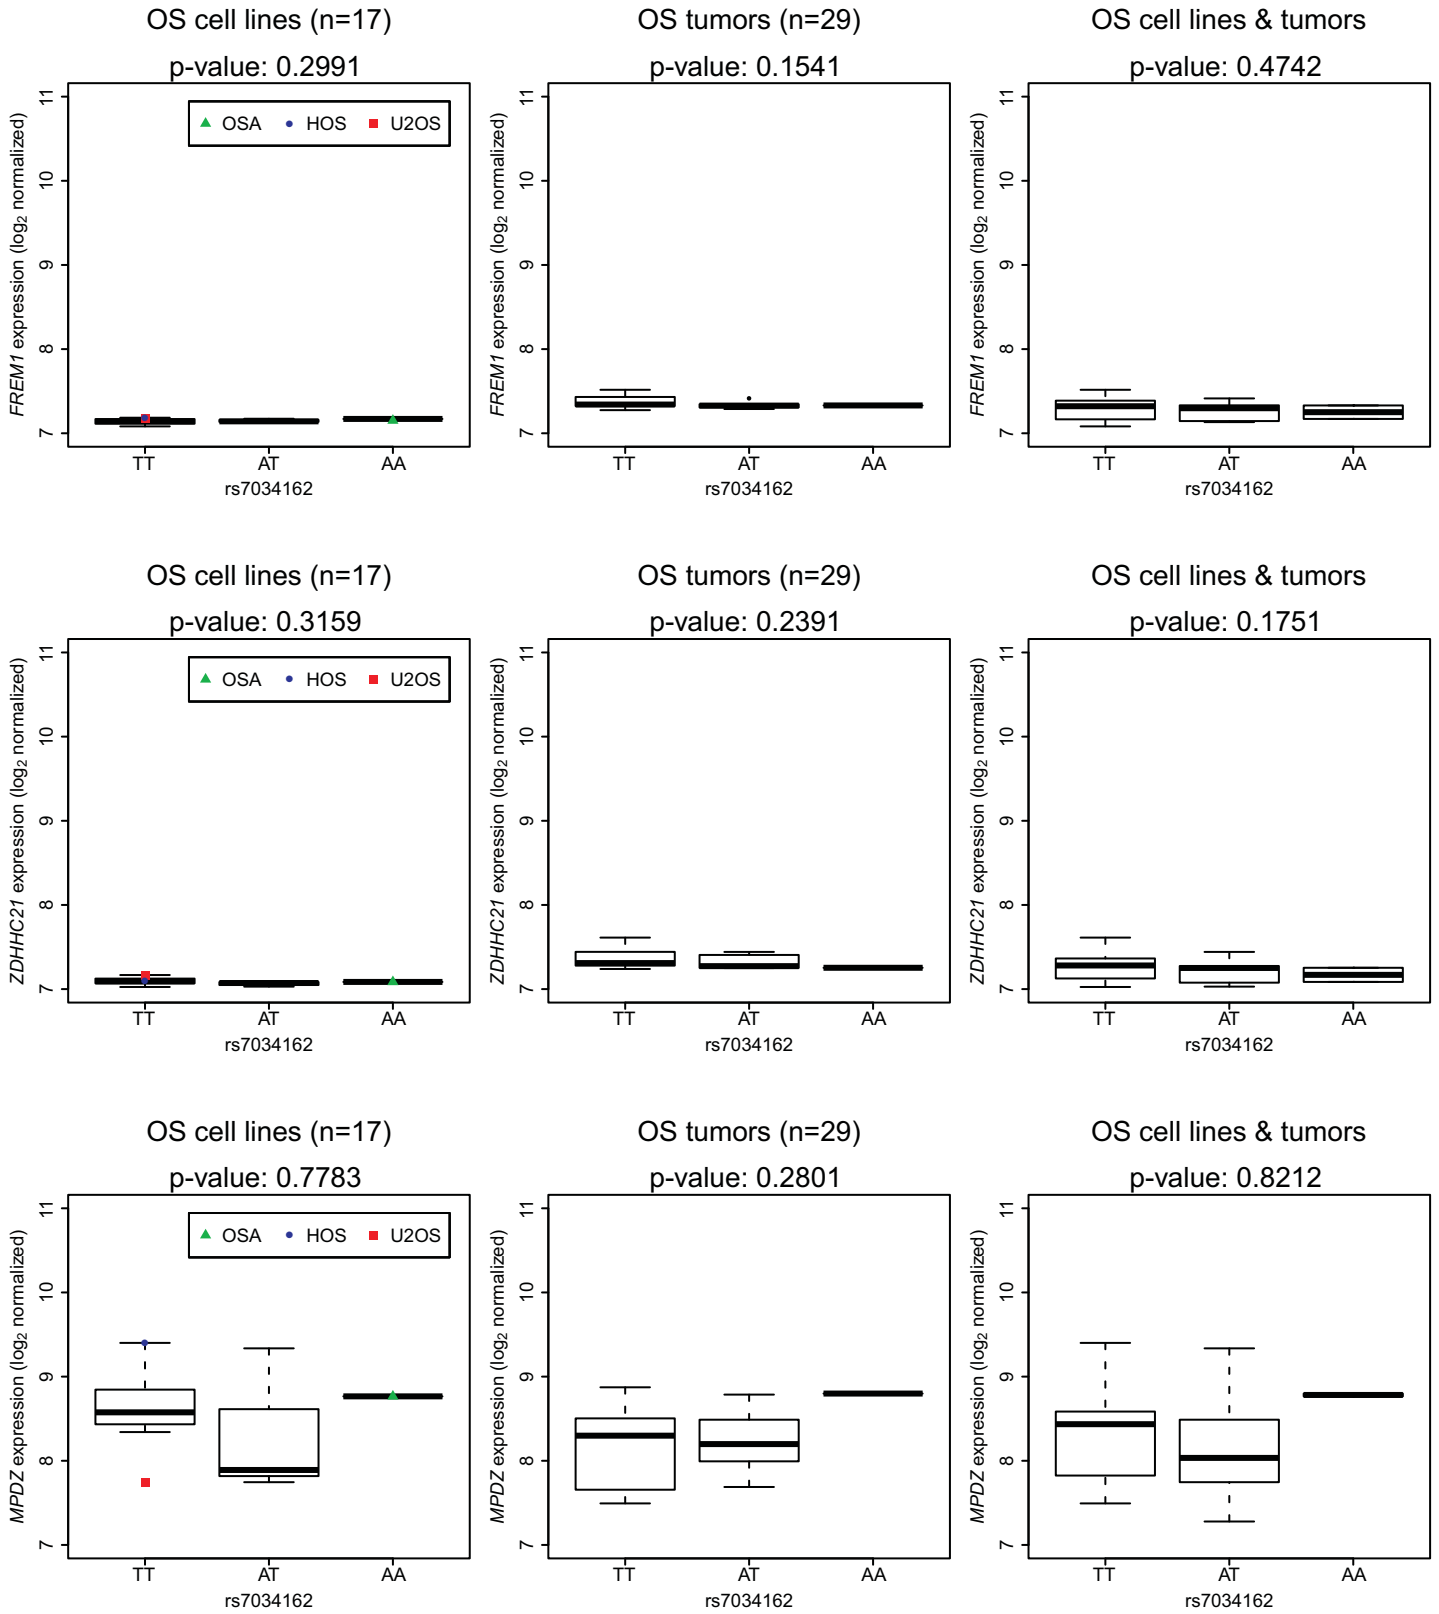

**A**

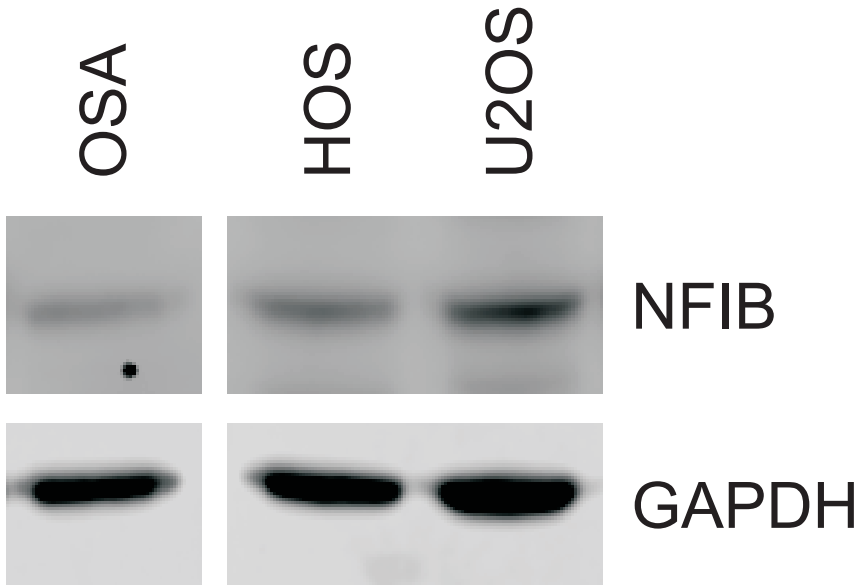

**B**

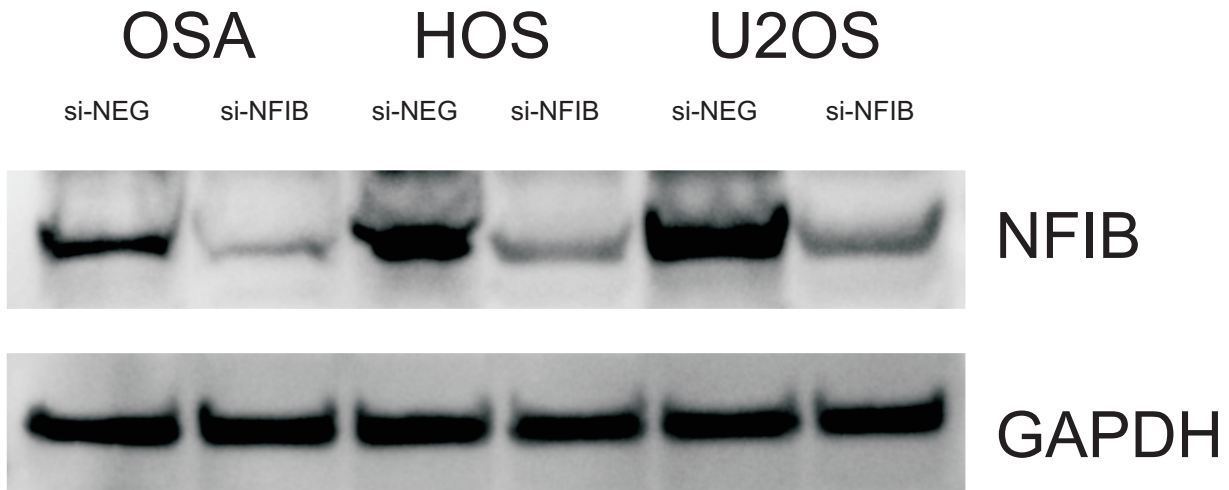

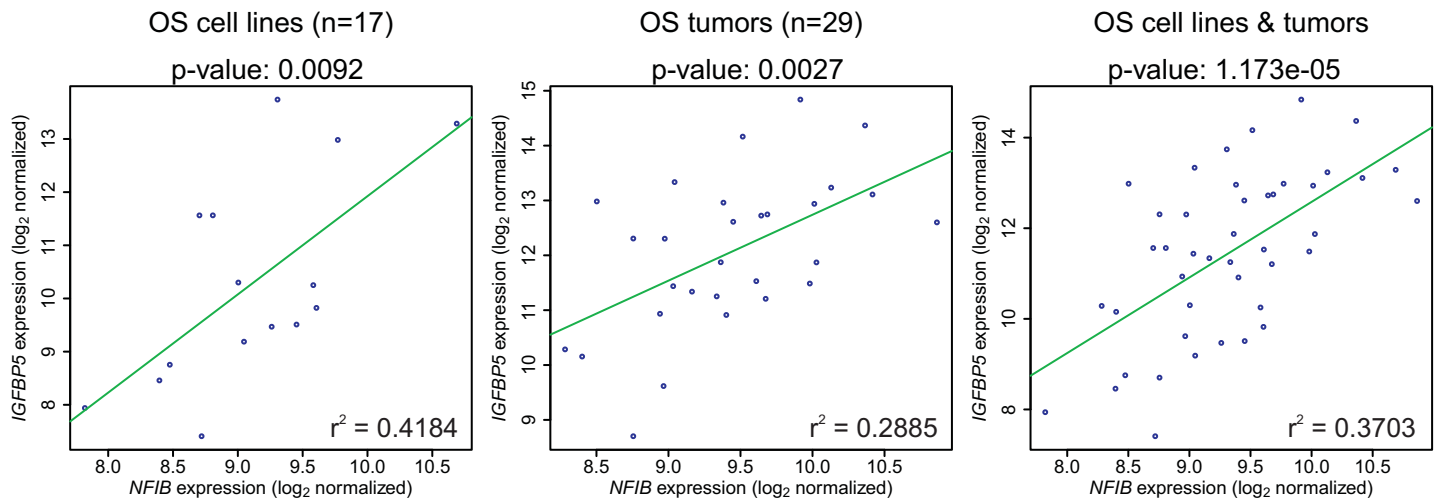

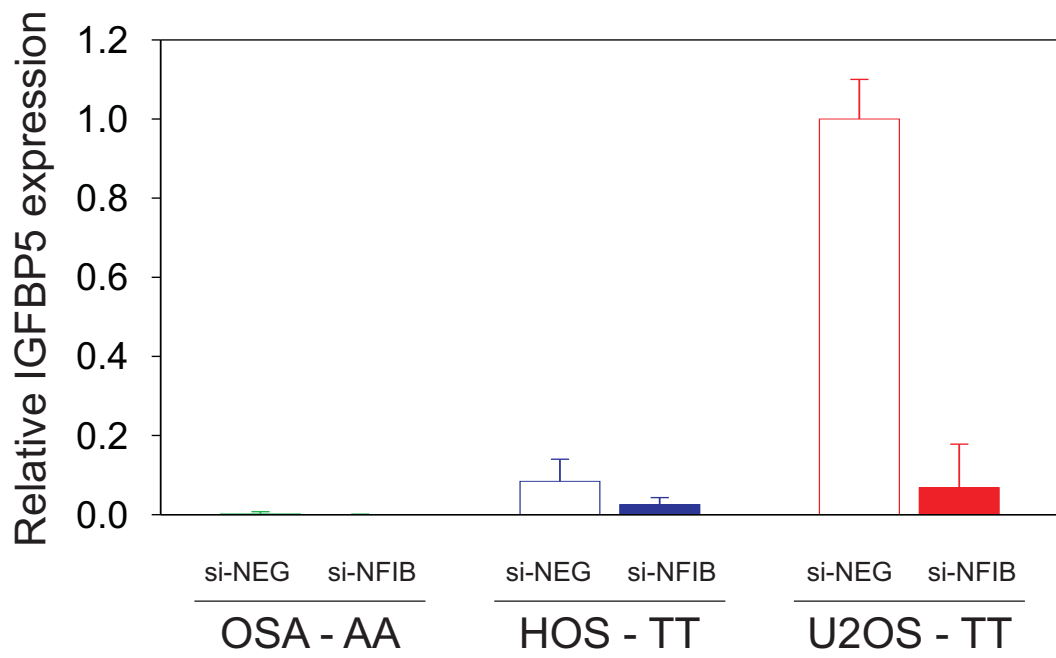

Supplemental Figure 8

Reference Allele

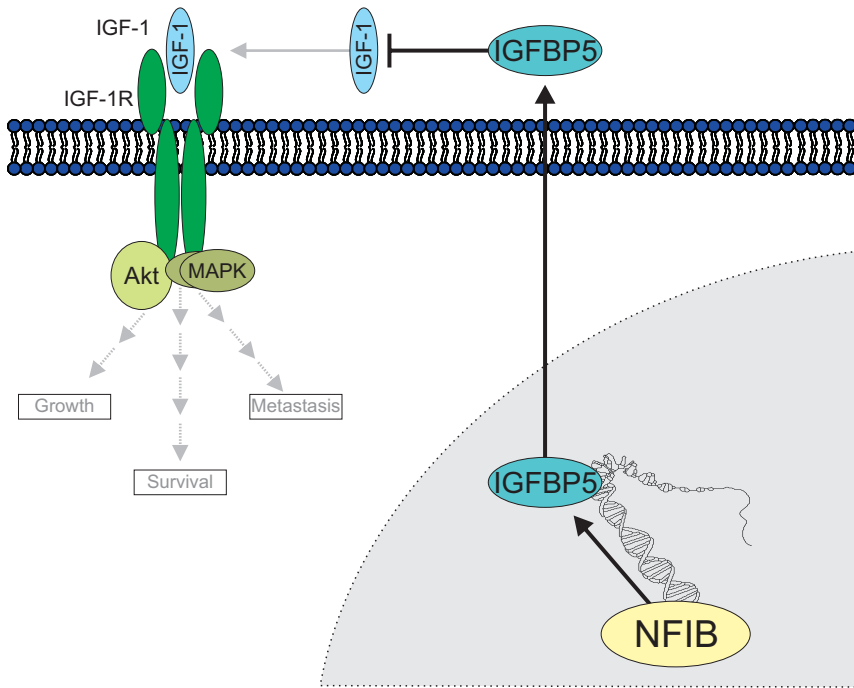

Risk Allele

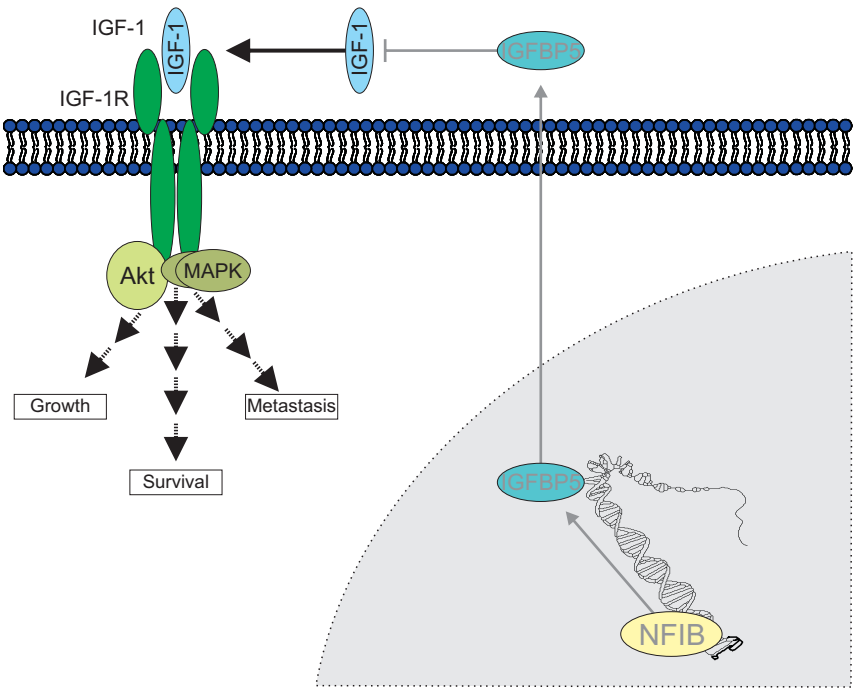



Supplemental Figure 9

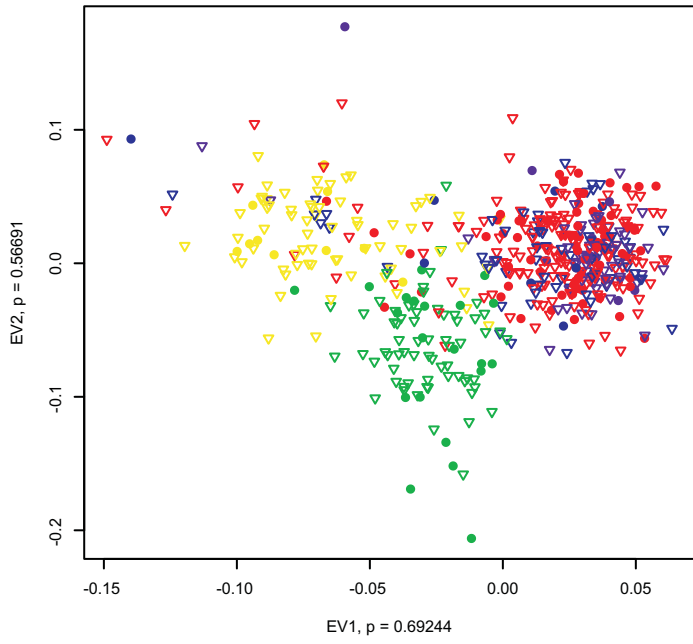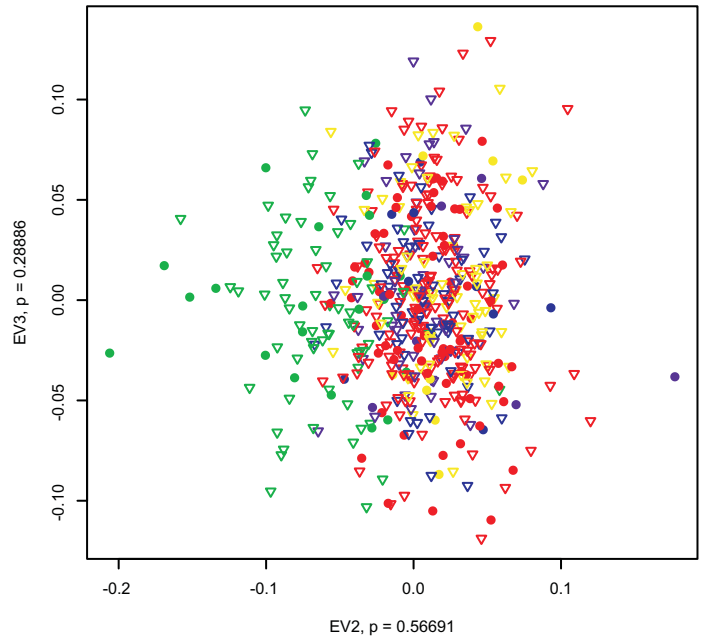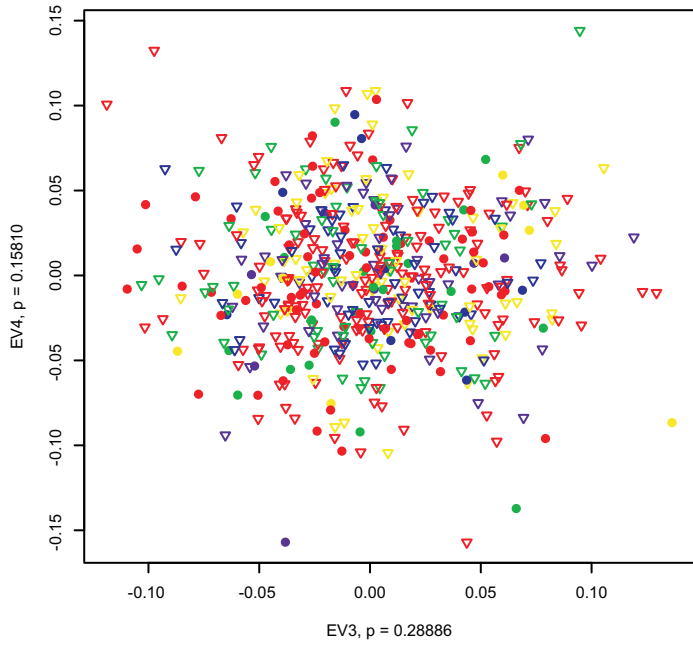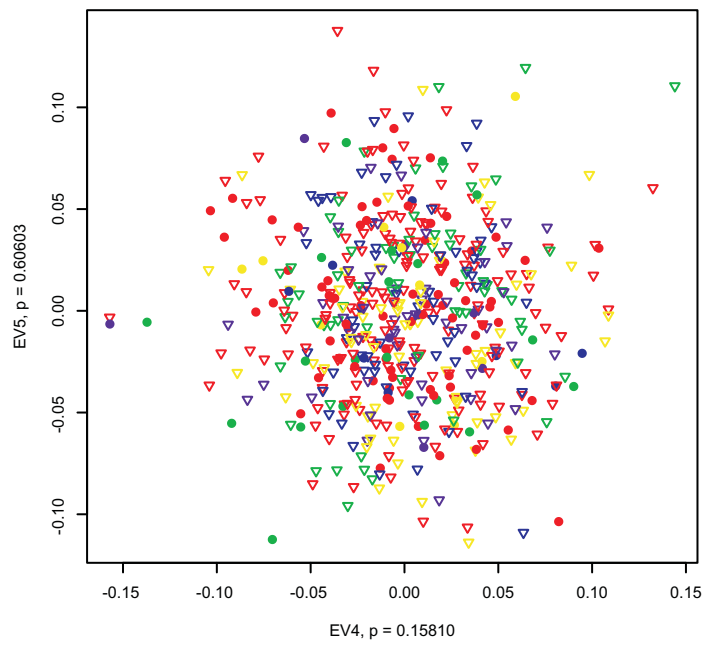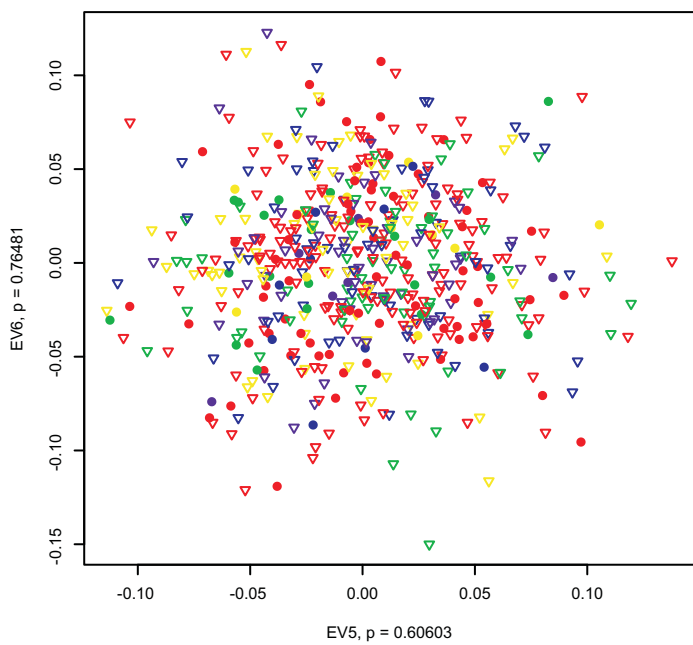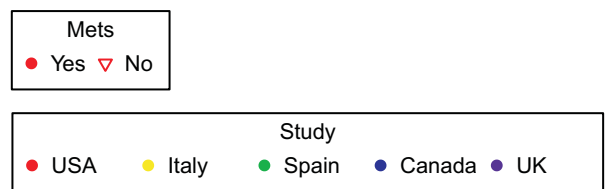

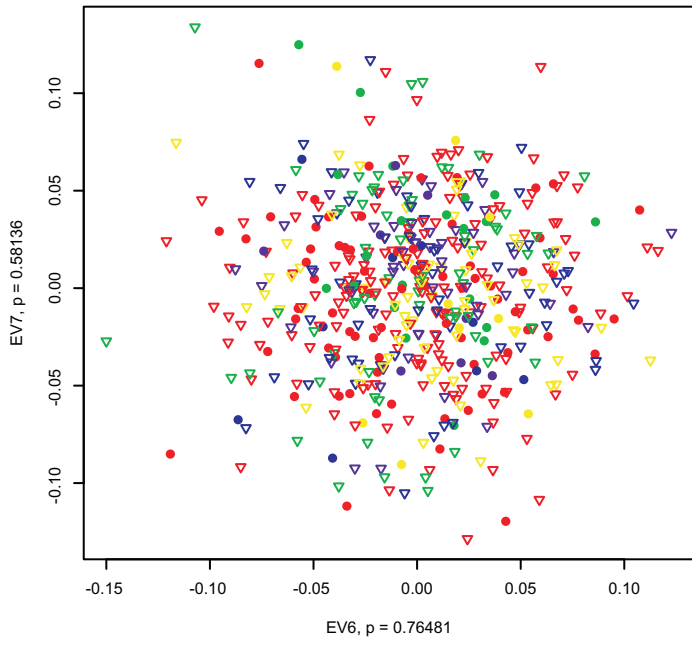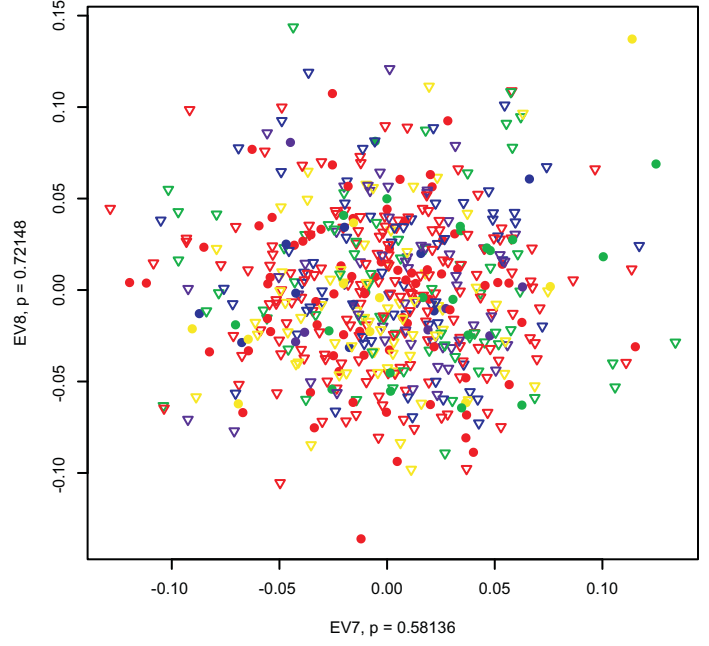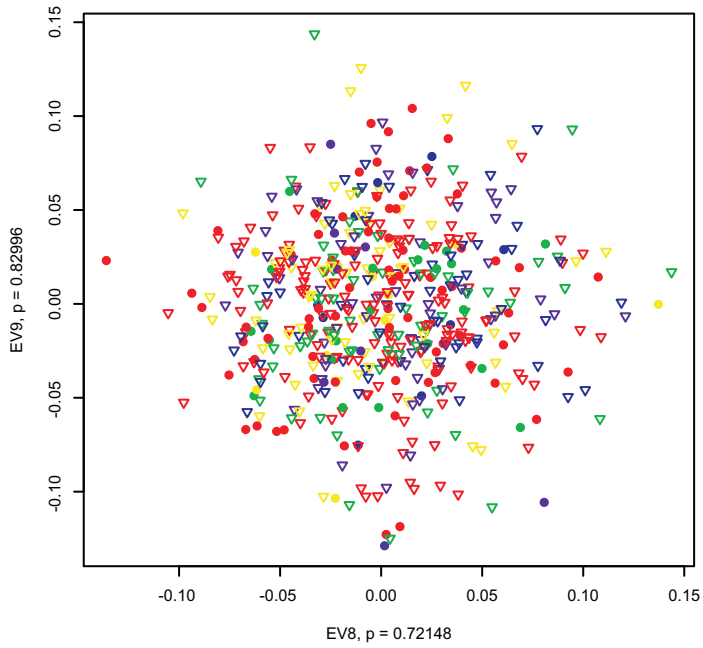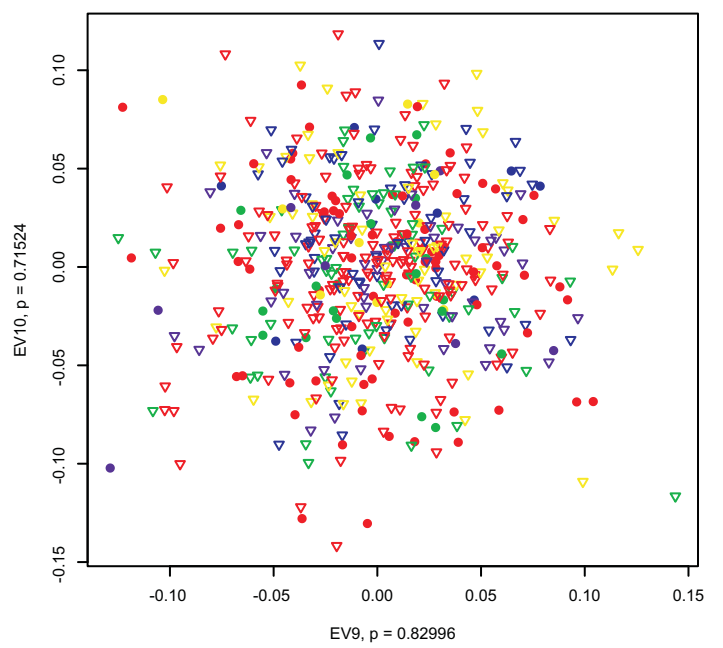

Mets  
● Yes ▼ No

Study  
● USA ● Italy ● Spain ● Canada ● UK

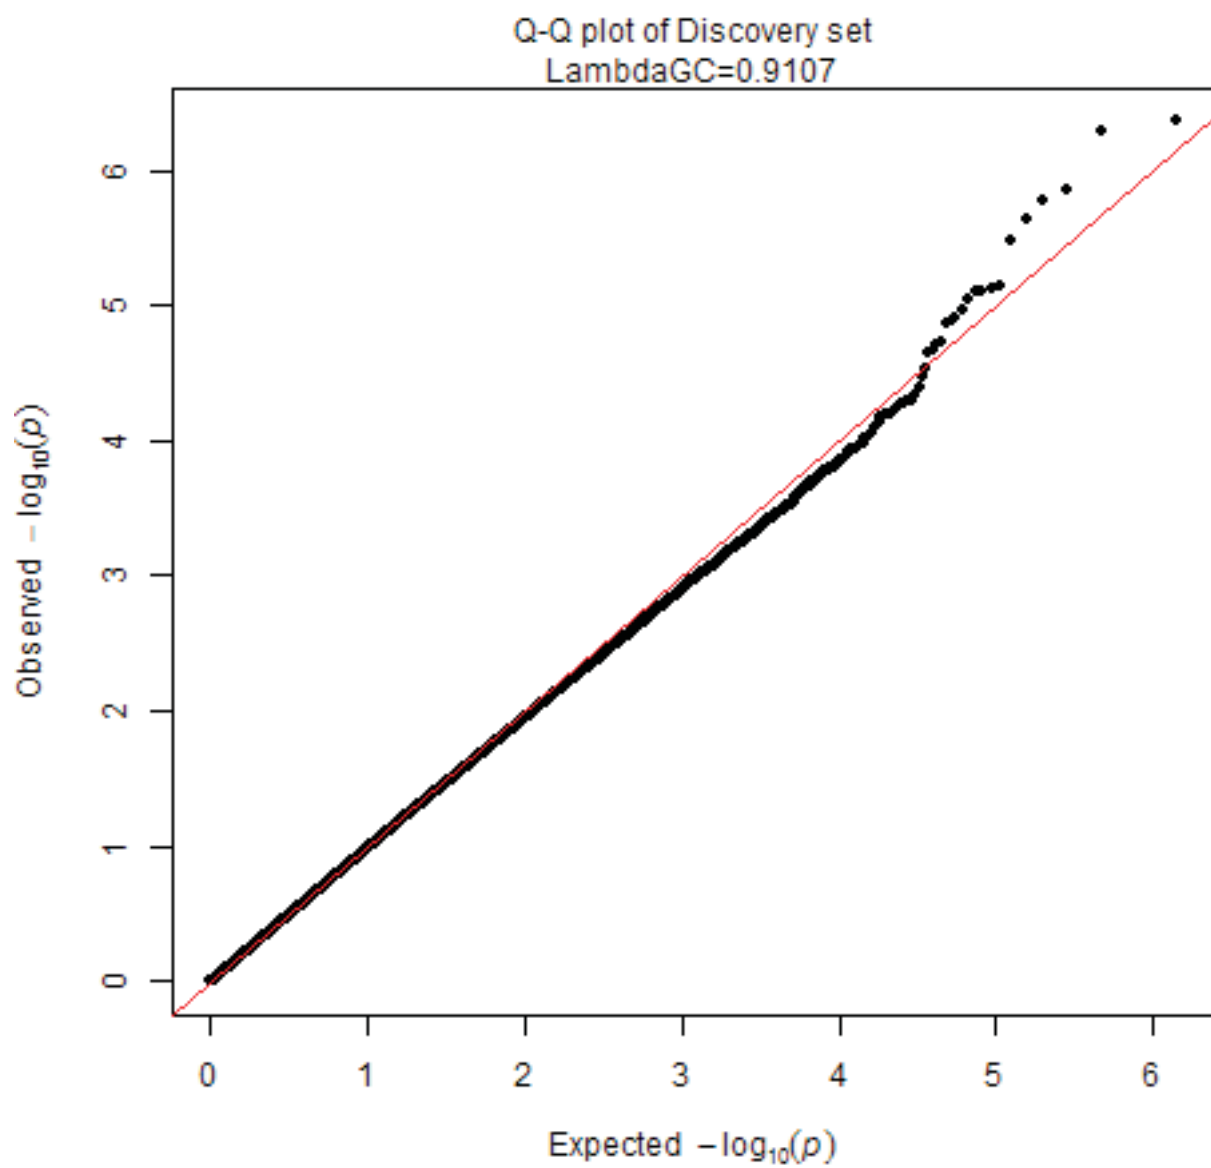

Supplement: NIHMS701560-supplement-1.pdf [file NIHMS701560-supplement-1.pdf]
